# Supplementary material for: First-in-human phase I study of ISTH0036, an antisense oligonucleotide selectively targeting transforming growth factor beta 2 (TGF-β2), in subjects with open-angle glaucoma undergoing glaucoma filtration surgery
Source: PubMed Central journal article supplement (PMC5708654; doi:10.1371/journal.pone.0188899), 2017-11-30
Supplement: pone.0188899.s003.pdf [file pone.0188899.s003.pdf]

**Intraocular pressure prior to surgery and on Day 43 and Day 85 by patient**

| Dose Level (DL) | Patient | IOP (mmHG)        |                |                 |
|-----------------|---------|-------------------|----------------|-----------------|
|                 |         | IOP (presurgical) | Day 43/ Week 6 | Day 85/ Week 12 |
| DL1             | 1       | 24                | 9.5            | 10.5            |
|                 | 2       | 58                | 11             | 12.5            |
|                 | 3       | 27                | 9              | 6               |
| DL2             | 1       | 14                | 13             | 12              |
|                 | 2       | 23                | 17             | 21.5            |
|                 | 3       | 33                | 4              | 9               |
| DL3             | 1       | 23.5              | 3.5            | 4               |
|                 | 2       | 15                | 4              | 6               |
|                 | 3       | 23                | 9              | 7.5             |
| DL4             | 1       | 43.5              | 9.5            | 7.5             |
|                 | 2       | 26                | 5              | 8.5             |
|                 | 3       | 17                | 8              | 7.5             |
